# Supplementary material for: Protein degradation sets the fraction of active ribosomes at vanishing growth
Source: PubMed Central journal article supplement (PMC9098079; doi:10.1371/journal.pcbi.1010059), 2022-05-02

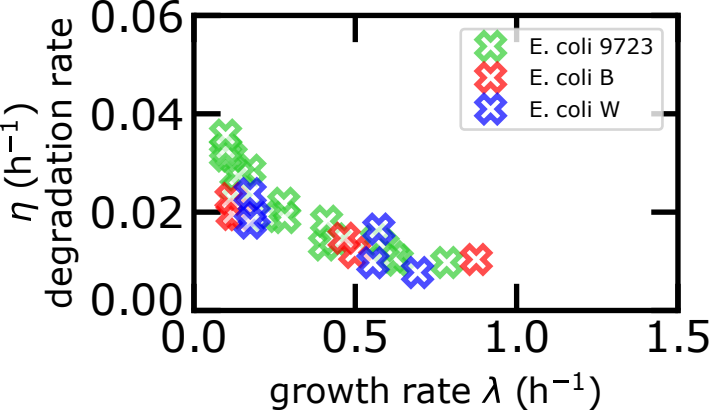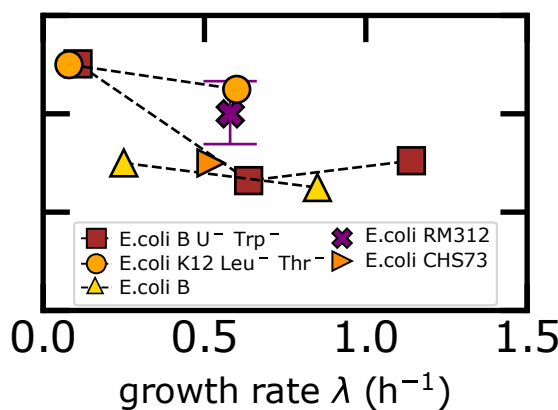

Supplement: pcbi.1010059.s002.pdf [file pcbi.1010059.s002.pdf]
